# Supplementary material
Source: HighWire-hosted journal article supplement (https://jnm.snmjournals.org/highwire/filestream/94192/field_highwire_adjunct_files/0/71357_Supplemental_Figure_1.pdf)
Supplement: 71357_Supplemental_Figure_1.pdf [file 71357_Supplemental_Figure_1.pdf]

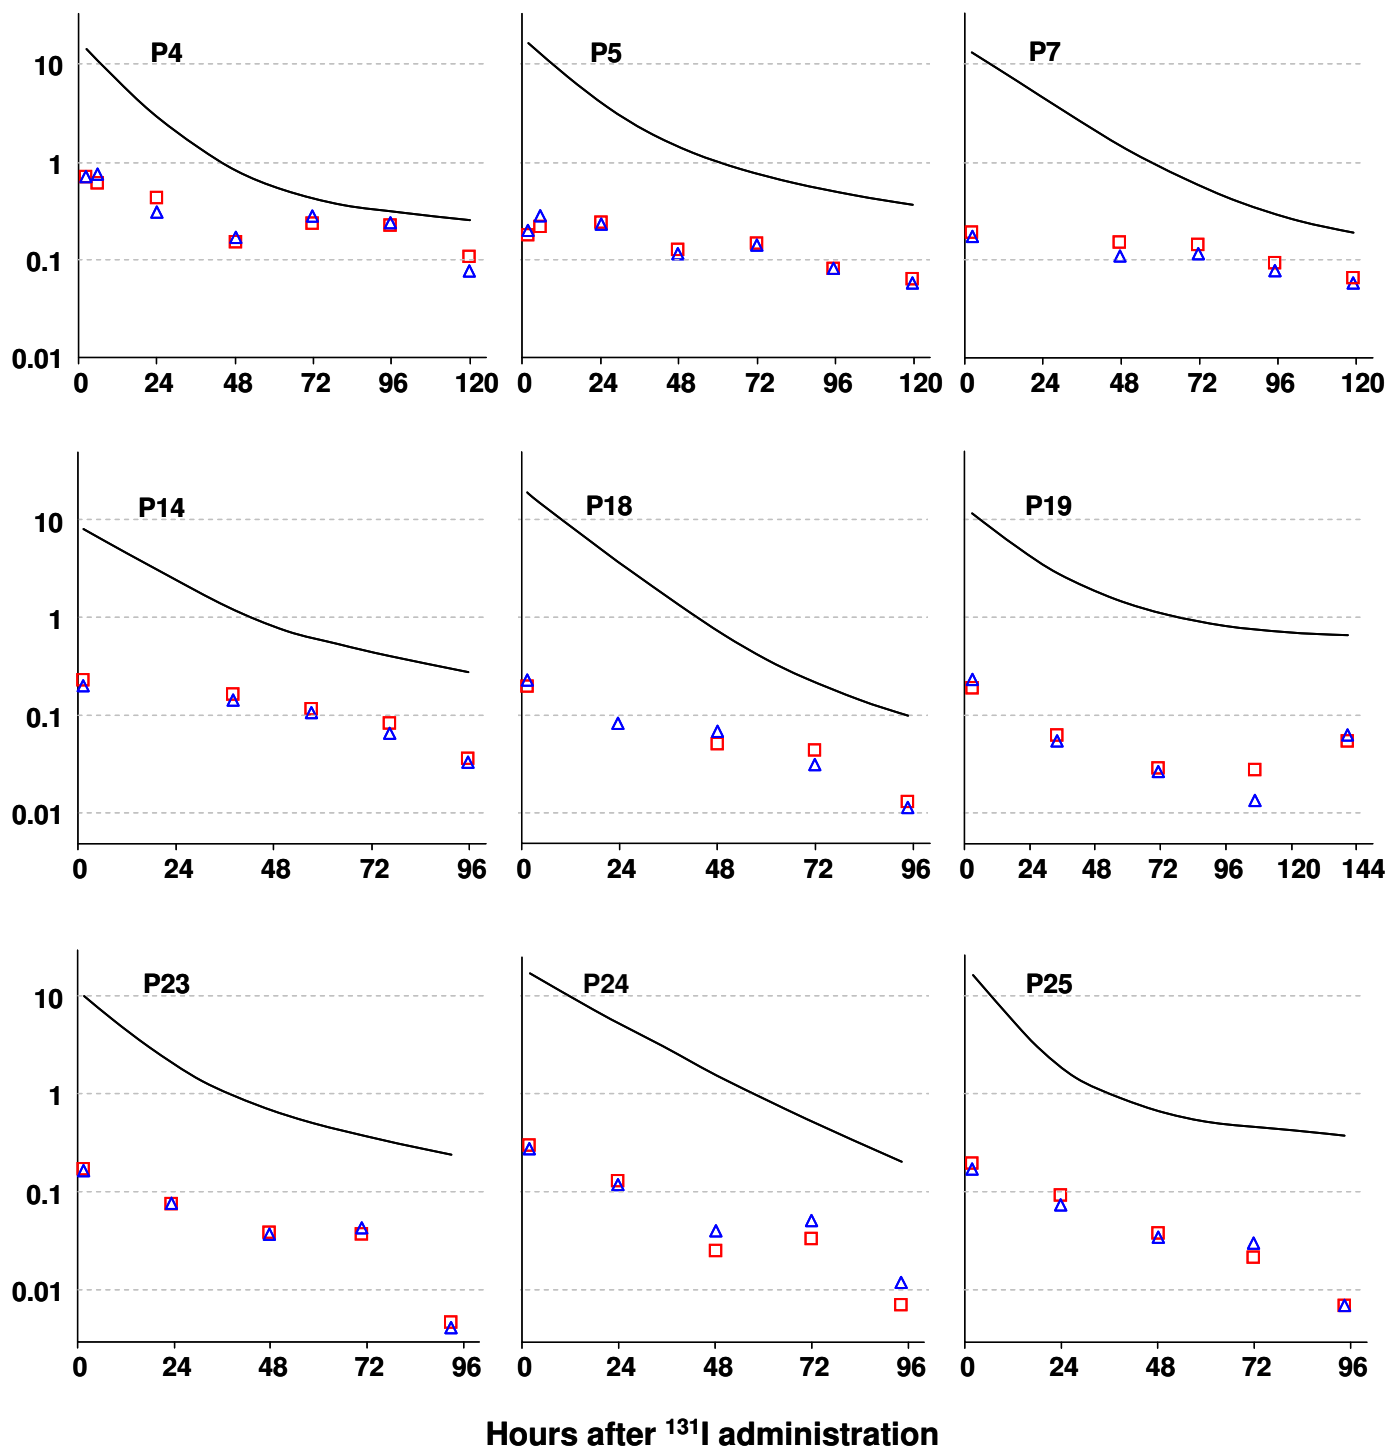

SUPPLEMENTAL FIGURE 1. Number of  $\gamma$ -H2AX (red squares) and 53BP1 (blue triangles) ionizing radiation-induced (nuclear) foci per cell compared to the blood dose rate (unit: mGy/h) as a function of time after iodine-131 administration (on a logarithmic scale). Included are all patients with complete data sets for 5 or more time points ( $n = 9$ ; P21 was excluded for “outlier” physical dosimetry results).
